# Supplementary material for: Applicability of Isolates and Fractions of Plant Extracts in Murine Models in Type II Diabetes: A Systematic Review
Source: Hindawi journal article supplement (doi:10.1155/2016/3537163), 2016-01-01
Supplement: f1 [file 3537163.f1.zip]

**Supplemental data 1.** Search terms used in the databases PUBMED and SCOPUS.

| Descriptors Pubmed                                                                                                                                                                                                                                                                                                                                                                                                                                                                                                                                                                                                                                                                                                                                                                                                                                                                                                                                                                                                                                                                                                                                                                                                                                                                                                                                                                                                                                                                                                                                                                                                                                                                                                                                                                                                                                                                                                                                                                                                                                                                                                                                                                                                                                                                                                                                                                                                                                                                                                                                                                                                                                                                                                                                                                                                                                                                   | Number    | Date/ Time                        |
|--------------------------------------------------------------------------------------------------------------------------------------------------------------------------------------------------------------------------------------------------------------------------------------------------------------------------------------------------------------------------------------------------------------------------------------------------------------------------------------------------------------------------------------------------------------------------------------------------------------------------------------------------------------------------------------------------------------------------------------------------------------------------------------------------------------------------------------------------------------------------------------------------------------------------------------------------------------------------------------------------------------------------------------------------------------------------------------------------------------------------------------------------------------------------------------------------------------------------------------------------------------------------------------------------------------------------------------------------------------------------------------------------------------------------------------------------------------------------------------------------------------------------------------------------------------------------------------------------------------------------------------------------------------------------------------------------------------------------------------------------------------------------------------------------------------------------------------------------------------------------------------------------------------------------------------------------------------------------------------------------------------------------------------------------------------------------------------------------------------------------------------------------------------------------------------------------------------------------------------------------------------------------------------------------------------------------------------------------------------------------------------------------------------------------------------------------------------------------------------------------------------------------------------------------------------------------------------------------------------------------------------------------------------------------------------------------------------------------------------------------------------------------------------------------------------------------------------------------------------------------------------|-----------|-----------------------------------|
| <p>#1 OR #2 = #3</p> <p>#1 Modelos Animais:</p> <p>("animal experimentation"[MeSH Terms] OR "models, animal"[MeSH Terms] OR "invertebrates"[MeSH Terms] OR "Animals"[Mesh:noexp] OR "animal population groups"[MeSH Terms] OR "chordata"[MeSH Terms:noexp] OR "chordata, nonvertebrate"[MeSH Terms] OR "vertebrates"[MeSH Terms:noexp] OR "amphibians"[MeSH Terms] OR "birds"[MeSH Terms] OR "fishes"[MeSH Terms] OR "reptiles"[MeSH Terms] OR "mammals"[MeSH Terms:noexp] OR "primates"[MeSH Terms:noexp] OR "artiodactyla"[MeSH Terms] OR "carnivora"[MeSH Terms] OR "cetacea"[MeSH Terms] OR "chiroptera"[MeSH Terms] OR "elephants"[MeSH Terms] OR "hyraxes"[MeSH Terms] OR "insectivora"[MeSH Terms] OR "lagomorpha"[MeSH Terms] OR "marsupialia"[MeSH Terms] OR "monotremata"[MeSH Terms] OR "perissodactyla"[MeSH Terms] OR "rodentia"[MeSH Terms] OR "scandentia"[MeSH Terms] OR "sirenia"[MeSH Terms] OR "xenarthra"[MeSH Terms] OR "haplorhini"[MeSH Terms:noexp] OR "strepsirhini"[MeSH Terms] OR "platyrrhini"[MeSH Terms] OR "tarsii"[MeSH Terms] OR "catarrhini"[MeSH Terms:noexp] OR "cercopithecidae"[MeSH Terms] OR "hylobatidae"[MeSH Terms] OR "hominidae"[MeSH Terms:noexp] OR "gorilla gorilla"[MeSH Terms] OR "pan paniscus"[MeSH Terms] OR "pan troglodytes"[MeSH Terms] OR "pongo pygmaeus"[MeSH Terms])</p> <p>#2 Modelos Animais:</p> <p>((animals[tiab] OR animal[tiab] OR mice[Tiab] OR mus[Tiab] OR mouse[Tiab] OR murine[Tiab] OR woodmouse[tiab] OR rats[Tiab] OR rat[Tiab] OR murinae[Tiab] OR muridae[Tiab] OR cottonrat[tiab] OR cottonrats[tiab] OR hamster[tiab] OR hamsters[tiab] OR cricetinae[tiab] OR rodentia[Tiab] OR rodent[Tiab] OR rodents[Tiab] OR pigs[Tiab] OR pig[Tiab] OR swine[tiab] OR swines[tiab] OR piglets[tiab] OR piglet[tiab] OR boar[tiab] OR boars[tiab] OR "sus scrofa"[tiab] OR ferrets[tiab] OR ferret[tiab] OR polecat[tiab] OR polecats[tiab] OR "mustela putorius"[tiab] OR "guinea pigs"[Tiab] OR "guinea pig"[Tiab] OR cavia[Tiab] OR callithrix[Tiab] OR marmoset[Tiab] OR marmosets[Tiab] OR cebuella[Tiab] OR hapale[Tiab] OR octodon[Tiab] OR chinchilla[Tiab] OR chinchillas[Tiab] OR gerbillinae[Tiab] OR gerbil[Tiab] OR gerbils[Tiab] OR jird[Tiab] OR jirds[Tiab] OR merione[Tiab] OR meriones[Tiab] OR rabbits[Tiab] OR rabbit[Tiab] OR hares[Tiab] OR hare[Tiab] OR diptera[Tiab] OR flies[Tiab] OR fly[Tiab] OR dipteral[Tiab] OR drosophila[Tiab] OR drosophilidae[Tiab] OR cats[Tiab] OR cat[Tiab] OR carus[Tiab] OR felis[Tiab] OR nematoda[Tiab] OR nematode[Tiab] OR nematoda[Tiab] OR nematode[Tiab] OR nematodes[Tiab] OR sipunculida[Tiab] OR dogs[Tiab] OR dog[Tiab] OR canine[Tiab] OR canines[Tiab] OR canis[Tiab] OR sheep[Tiab] OR sheeps[Tiab] OR mouflon[Tiab] OR mouflons[Tiab] OR ovis[Tiab] OR goats[Tiab] OR goat[Tiab] OR capra[Tiab] OR capras[Tiab] OR rupicapra[Tiab] OR</p> | 5.865.508 | <p>03-09-2015</p> <p>15h55min</p> |

|                                                                                                                                                                                                                                                                                                                                                                                                                                                                                                                                                                                                                                                                                                                                                                                                                                                                                                                                                                                                                                                                                                                                                                                                                                                                                                                                                                                                                                                                                                                                                                                                                                                                                                                                                                                                                                                                                                                                                                                                                                                                                                                                                                                                                                                                                                                                                                                                                                                                                                                                                                                                                                                                                                                                                                                                                                                                                                                                                                                                                                                                                                                                                                                                                                                                                                                                                                                                                                                                                                                                                                                                                    |  |  |
|--------------------------------------------------------------------------------------------------------------------------------------------------------------------------------------------------------------------------------------------------------------------------------------------------------------------------------------------------------------------------------------------------------------------------------------------------------------------------------------------------------------------------------------------------------------------------------------------------------------------------------------------------------------------------------------------------------------------------------------------------------------------------------------------------------------------------------------------------------------------------------------------------------------------------------------------------------------------------------------------------------------------------------------------------------------------------------------------------------------------------------------------------------------------------------------------------------------------------------------------------------------------------------------------------------------------------------------------------------------------------------------------------------------------------------------------------------------------------------------------------------------------------------------------------------------------------------------------------------------------------------------------------------------------------------------------------------------------------------------------------------------------------------------------------------------------------------------------------------------------------------------------------------------------------------------------------------------------------------------------------------------------------------------------------------------------------------------------------------------------------------------------------------------------------------------------------------------------------------------------------------------------------------------------------------------------------------------------------------------------------------------------------------------------------------------------------------------------------------------------------------------------------------------------------------------------------------------------------------------------------------------------------------------------------------------------------------------------------------------------------------------------------------------------------------------------------------------------------------------------------------------------------------------------------------------------------------------------------------------------------------------------------------------------------------------------------------------------------------------------------------------------------------------------------------------------------------------------------------------------------------------------------------------------------------------------------------------------------------------------------------------------------------------------------------------------------------------------------------------------------------------------------------------------------------------------------------------------------------------------|--|--|
| chamois[Tiab] OR haplorhini[Tiab] OR monkey[Tiab] OR<br>monkeys[Tiab] OR anthropoidea[Tiab] OR anthropoids[Tiab]<br>OR saguinus[Tiab] OR tamarin[Tiab] OR tamarins[Tiab] OR<br>leontopithecus[Tiab] OR hominidae[Tiab] OR ape[Tiab] OR<br>apes[Tiab] OR pan[Tiab] OR paniscus[Tiab] OR "pan<br>paniscus"[Tiab] OR bonobo[Tiab] OR bonobos[Tiab] OR<br>troglodytes[Tiab] OR "pan troglodytes"[Tiab] OR gibbon[Tiab]<br>OR gibbons[Tiab] OR siamang[Tiab] OR siamangs[Tiab] OR<br>nomascus[Tiab] OR symphalangus[Tiab] OR chimpanzee[Tiab]<br>OR chimpanzees[Tiab] OR prosimians[Tiab] OR "bush<br>baby"[Tiab] OR prosimian[Tiab] OR bush babies[Tiab] OR<br>galagos[Tiab] OR galago[Tiab] OR pongidae[Tiab] OR<br>gorilla[Tiab] OR gorillas[Tiab] OR pongo[Tiab] OR<br>pygmaeus[Tiab] OR "pongo pygmaeus"[Tiab] OR<br>orangutans[Tiab] OR pygmaeus[Tiab] OR lemur[Tiab] OR<br>lemurs[Tiab] OR lemuridae[Tiab] OR horse[Tiab] OR<br>horses[Tiab] OR pongo[Tiab] OR equus[Tiab] OR cow[Tiab] OR<br>calf[Tiab] OR bull[Tiab] OR chicken[Tiab] OR chickens[Tiab]<br>OR gallus[Tiab] OR quail[Tiab] OR bird[Tiab] OR birds[Tiab]<br>OR quails[Tiab] OR poultry[Tiab] OR poultries[Tiab] OR<br>fowl[Tiab] OR fowls[Tiab] OR reptile[Tiab] OR reptilia[Tiab]<br>OR reptiles[Tiab] OR snakes[Tiab] OR snake[Tiab] OR<br>lizard[Tiab] OR lizards[Tiab] OR alligator[Tiab] OR<br>alligators[Tiab] OR crocodile[Tiab] OR crocodiles[Tiab] OR<br>turtle[Tiab] OR turtles[Tiab] OR amphibian[Tiab] OR<br>amphibians[Tiab] OR amphibia[Tiab] OR frog[Tiab] OR<br>frogs[Tiab] OR bombina[Tiab] OR salientia[Tiab] OR toad[Tiab]<br>OR toads[Tiab] OR "epidalea calamita"[Tiab] OR<br>salamander[Tiab] OR salamanders[Tiab] OR eel[Tiab] OR<br>eels[Tiab] OR fish[Tiab] OR fishes[Tiab] OR pisces[Tiab] OR<br>catfish[Tiab] OR catfishes[Tiab] OR siluriformes[Tiab] OR<br>arius[Tiab] OR heteropneustes[Tiab] OR sheatfish[Tiab] OR<br>perch[Tiab] OR perches[Tiab] OR percidae[Tiab] OR<br>perca[Tiab] OR trout[Tiab] OR trouts[Tiab] OR char[Tiab] OR<br>chars[Tiab] OR salvelinus[Tiab] OR "fathead minnow"[Tiab] OR<br>minnow[Tiab] OR cyprinidae[Tiab] OR carps[Tiab] OR<br>carp[Tiab] OR zebrafish[Tiab] OR zebrafishes[Tiab] OR<br>goldfish[Tiab] OR goldfishes[Tiab] OR guppy[Tiab] OR<br>guppies[Tiab] OR chub[Tiab] OR chubs[Tiab] OR tinca[Tiab]<br>OR barbels[Tiab] OR barbus[Tiab] OR pimephales[Tiab] OR<br>promelas[Tiab] OR "poecilia reticulata"[Tiab] OR mullet[Tiab]<br>OR mullets[Tiab] OR seahorse[Tiab] OR seahorses[Tiab] OR<br>mugil curema[Tiab] OR atlantic cod[Tiab] OR shark[Tiab] OR<br>sharks[Tiab] OR catshark[Tiab] OR anguilla[Tiab] OR<br>salmonid[Tiab] OR salmonids[Tiab] OR whitefish[Tiab] OR<br>whitefishes[Tiab] OR salmon[Tiab] OR salmons[Tiab] OR<br>sole[Tiab] OR solea[Tiab] OR "sea lamprey"[Tiab] OR<br>lamprey[Tiab] OR lampreys[Tiab] OR pumpkinseed[Tiab] OR<br>sunfish[Tiab] OR sunfishes[Tiab] OR tilapia[Tiab] OR<br>tilapias[Tiab] OR turbot[Tiab] OR turbots[Tiab] OR<br>flatfish[Tiab] OR flatfishes[Tiab] OR sciuridae[Tiab] OR<br>squirrel[Tiab] OR squirrels[Tiab] OR chipmunk[Tiab] OR<br>chipmunks[Tiab] OR suslik[Tiab] OR susliks[Tiab] OR<br>vole[Tiab] OR voles[Tiab] OR lemming[Tiab] OR<br>lemmings[Tiab] OR muskrat[Tiab] OR muskrats[Tiab] OR<br>lemmus[Tiab] OR otter[Tiab] OR otters[Tiab] OR marten[Tiab]<br>OR martens[Tiab] OR martes[Tiab] OR weasel[Tiab] OR<br>badger[Tiab] OR badgers[Tiab] OR ermine[Tiab] OR mink[Tiab]<br>OR minks[Tiab] OR sable[Tiab] OR sables[Tiab] OR gulo[Tiab]<br>OR gulos[Tiab] OR wolverine[Tiab] OR wolverines[Tiab] OR |  |  |
|--------------------------------------------------------------------------------------------------------------------------------------------------------------------------------------------------------------------------------------------------------------------------------------------------------------------------------------------------------------------------------------------------------------------------------------------------------------------------------------------------------------------------------------------------------------------------------------------------------------------------------------------------------------------------------------------------------------------------------------------------------------------------------------------------------------------------------------------------------------------------------------------------------------------------------------------------------------------------------------------------------------------------------------------------------------------------------------------------------------------------------------------------------------------------------------------------------------------------------------------------------------------------------------------------------------------------------------------------------------------------------------------------------------------------------------------------------------------------------------------------------------------------------------------------------------------------------------------------------------------------------------------------------------------------------------------------------------------------------------------------------------------------------------------------------------------------------------------------------------------------------------------------------------------------------------------------------------------------------------------------------------------------------------------------------------------------------------------------------------------------------------------------------------------------------------------------------------------------------------------------------------------------------------------------------------------------------------------------------------------------------------------------------------------------------------------------------------------------------------------------------------------------------------------------------------------------------------------------------------------------------------------------------------------------------------------------------------------------------------------------------------------------------------------------------------------------------------------------------------------------------------------------------------------------------------------------------------------------------------------------------------------------------------------------------------------------------------------------------------------------------------------------------------------------------------------------------------------------------------------------------------------------------------------------------------------------------------------------------------------------------------------------------------------------------------------------------------------------------------------------------------------------------------------------------------------------------------------------------------------|--|--|

|                                                                                                                                                                                                                                                                                                                                                                                                                                                                                                                                                                                                                                                                                                                                                                                                                                                                                                 |         |                        |
|-------------------------------------------------------------------------------------------------------------------------------------------------------------------------------------------------------------------------------------------------------------------------------------------------------------------------------------------------------------------------------------------------------------------------------------------------------------------------------------------------------------------------------------------------------------------------------------------------------------------------------------------------------------------------------------------------------------------------------------------------------------------------------------------------------------------------------------------------------------------------------------------------|---------|------------------------|
| minks[Tiab] OR mustela[Tiab] OR llama[Tiab] OR llamas[Tiab] OR alpaca[Tiab] OR alpacas[Tiab] OR camelid[Tiab] OR camelids[Tiab] OR guanaco[Tiab] OR guanacos[Tiab] OR chiroptera[Tiab] OR chiropteras[Tiab] OR bat[Tiab] OR bats[Tiab] OR fox[Tiab] OR foxes[Tiab] OR iguana[Tiab] OR iguanas[Tiab] OR xenopus laevis[Tiab] OR parakeet[Tiab] OR parakeets[Tiab] OR parrot[Tiab] OR parrots[Tiab] OR donkey[Tiab] OR donkeys[Tiab] OR mule[Tiab] OR mules[Tiab] OR zebra[Tiab] OR zebras[Tiab] OR shrew[Tiab] OR shrews[Tiab] OR bison[Tiab] OR bisons[Tiab] OR buffalo[Tiab] OR buffaloes[Tiab] OR deer[Tiab] OR deers[Tiab] OR bear[Tiab] OR bears[Tiab] OR panda[Tiab] OR pandas[Tiab] OR "wild hog"[Tiab] OR "wild boar"[Tiab] OR fitchew[Tiab] OR fitch[Tiab] OR beaver[Tiab] OR beavers[Tiab] OR jerboa[Tiab] OR jerboas[Tiab] OR capybara[Tiab] OR capybaras[Tiab]) NOT medline[subset]) |         |                        |
| #4 Plantas:<br><br>("Plants, Medicinal"[MeSH Terms] OR "Plant Extracts"[MeSH Terms] OR "Phytotherapy"[MeSH Terms] OR "Herbal Therapy"[TIAB] OR "Herb Therapy"[TIAB] OR "Drugs, Chinese Herbal"[MeSH Terms] OR "Chinese Plant Extracts"[TIAB] OR "Herbal Drug"[TIAB] OR "Herbal extract"[TIAB] OR "Plant Preparations"[MeSH Terms] OR "Herbal Preparation"[TIAB] OR "Plant Bark"[MeSH Terms] OR "plant leaves"[MeSH Terms] OR "plant leaf"[TIAB] OR "seeds extract"[TIAB] OR "bark extract"[TIAB] OR "leaves extract"[TIAB] OR "root extract"[TIAB] OR "fruits extract"[TIAB] OR "flowers Extract"[TIAB] OR "Plant Oils"[MeSH Terms] OR "Vegetable Oils"[TIAB])                                                                                                                                                                                                                                  | 237.971 | 03-09-2015<br>15h53min |
| #5 Diabetes Mellitus tipo II:<br><br>("diabetes mellitus, type 2"[MeSH Terms] OR "diabetes mellitus, type 2" [TIAB])                                                                                                                                                                                                                                                                                                                                                                                                                                                                                                                                                                                                                                                                                                                                                                            | 289.740 | 03-09-2015<br>15h53min |
| #3 AND #4 AND #5                                                                                                                                                                                                                                                                                                                                                                                                                                                                                                                                                                                                                                                                                                                                                                                                                                                                                | 572     | 03/09/2015             |

| Descriptors Scopus                                                                                                                                                                                                                                                                                                                                                                                                                                                                                                                                                                                                                                                                                                                       | Number  | Date/ Time                 |
|------------------------------------------------------------------------------------------------------------------------------------------------------------------------------------------------------------------------------------------------------------------------------------------------------------------------------------------------------------------------------------------------------------------------------------------------------------------------------------------------------------------------------------------------------------------------------------------------------------------------------------------------------------------------------------------------------------------------------------------|---------|----------------------------|
| #1 Plantas<br><br>(TITLE-ABS-KEY("Medicinal Plants") OR TITLE-ABS-KEY("Plant Extract") OR TITLE-ABS-KEY("Plant Extracts") OR TITLE-ABS-KEY("Phytotherapy") OR TITLE-ABS-KEY("Herb Therapy") OR TITLE-ABS-KEY("Herbal Drug") OR TITLE-ABS-KEY("Herbal Drugs") OR TITLE-ABS-KEY("Herbal extract") OR TITLE-ABS-KEY("Herbal extracts") OR TITLE-ABS-KEY("Plant Preparations") OR TITLE-ABS-KEY("Plant Preparation") OR TITLE-ABS-KEY("Herbal Preparations") OR TITLE-ABS-KEY("Bark extract") OR TITLE-ABS-KEY("leaves extract") OR TITLE-ABS-KEY("seeds extract") OR TITLE-ABS-KEY("roots extract") OR TITLE-ABS-KEY("fruits extract") OR TITLE-ABS-KEY("flowers Extract") OR TITLE-ABS-KEY("Plant Oil") OR TITLE-ABS-KEY("Vegetable Oil")) | 237.484 | 03-09-2015<br><br>17h03min |
| #2 Diabetes Mellitus tipo II:<br><br>(TITLE-ABS-KEY ("diabetes mellitus, type 2"))                                                                                                                                                                                                                                                                                                                                                                                                                                                                                                                                                                                                                                                       | 81.063  | 03-09-2015<br><br>17h01min |
| #1 AND #2 AND Scopus' filter animal                                                                                                                                                                                                                                                                                                                                                                                                                                                                                                                                                                                                                                                                                                      | 495     | 03/09/2015                 |
