# Supplementary material for: Applicability of Isolates and Fractions of Plant Extracts in Murine Models in Type II Diabetes: A Systematic Review
Source: Evid Based Complement Alternat Med. 2016 Oct 24;2016:3537163. doi: 10.1155/2016/3537163 (PMC5098081; doi:10.1155/2016/3537163)
Supplement: Supplementary file 1 — Descriptors used for advanced search in PubMed and Scopus. [file 3537163.f1.zip]

Archive with 2 entries (2 files):
- Supplementary/mat.3537163.v1 (1).xlsx
- Supplementary/Supplementary Data 3537163.v1.pdf
