# Supplementary material for: Applicability of Isolates and Fractions of Plant Extracts in Murine Models in Type II Diabetes: A Systematic Review
Source: Evid Based Complement Alternat Med. 2016 Oct 24;2016:3537163. doi: 10.1155/2016/3537163 (PMC5098081; doi:10.1155/2016/3537163)
Supplement: Supplementary file 1 — Descriptors used for advanced search in PubMed and Scopus. [file 3537163.f1.zip › Supplementary/mat.3537163.v1 (1).xlsx]

## Sheet: Table 1
Table qualitative descriptors
ISOLATES	Title		Author/ Publication Year		Country	Animal model/ Strain	Animal number	Sex	Age	Weight	Housing of animals	Numbers of animals per box	Animal Number	Groups and number of animals in each group		Randomization	Plant specie		Isolate / Fraction	Administration	Doses used	Treatment time		Drug that induces Diabetes		Route of induction	Value of proof of Hyperglycemia	Control of Glycemia	Insulin tolerance test	Analyses of the Blood samples			Analysis of other biochemical and tissue parameters
	25.A polysaccharide extract of mulberry leaf ameliorates hepatic glucose metabolism and insulin signaling in ratswith type 2 diabetes induced by high fat-diet and streptozotocin.		Chunjiu Ren (2015)		Chine	Wistar rats	18	Male	7 weeks	200g	Cages	5	18	3 groups (6 in each group)		Yes	Mulbery		Mulberry leaf polysaccharide (MLPII)	Gavage	200 mg/kg	6 days of treatment		Feed with diet modified to contain 41.2% fat for 2 weeks, followed by a low-dose STZ (35 mg/kg body weight)		Intraperitoneal injection	Fasting blood glucose (FBG) ≥ 7.8 mmol/L	?	Yes	Plasma insulin was measured with a HH6003 γ radioimmunoassay analyzer (Chinese Nuclear Instrument and Equipment, Co., Beijing, China) using a radioimmunoassay kit purchased from Beijing Chemclin Biotech (Beijing, China). Plasma glucose was determined using a glucose meter (ROCHE, Los Angeles, CA, USA).			The glycogen content was determined by treatment with anthrone and measured at 620 nm using a spectrophotometer.
	26. Antidiabetic activity of a xanthone compound, mangiferin		Toshihiro Miura (2001)		Japan	Mice	?	Male	12 weeks	?	?	?	?	?		?	Anemarrhena asphodeloides Bunge		Mangiferin	Orally	30mg/kg	?		Genetically modified		_	_	?	Yes	The glucose level of the blood was determined using the glucose-oxidase method and serum insulin was measured by the double-antibody method.			?
	27. Anti-diabetic effect of a novel N-Trisaccharide isolated from Cucumis prophetarum on streptozotocin-nicotinamide induced type 2 diabetic rats.		G.B. Kavishankar (2014)		India	Wistar Rats	36	Male and Female	?	150–180 g	Cages	?	36	6 groups ( 6 animals in each)		?	Cucumis prophetarum		N-Trisaccharide	Gavage	50-5mg/kg	28 days of treatment		Nicotinamide (NA) at 230 mg/kg and Streptozotocin (STZ) at 65 mg/kg.		Intraperitoneal Injection	Fasting blood glucose ≥ 250 mg/dl	Yes	Yes	Plasma insulin level was measured according to the method described by Herbert et al.(1965), Glycosylated hemoglobin was estimated by the method of Sudhakar Nayak and Pattabiraman (1981). Hepatic glycogen levels were measured by the method of Kemp and Hejnigen (1954).			Histological studies of pancreas by paraffin technique, processing liver and kidneys for determination of glycogen.
	28. Antidiabetic effects of the Cimicifuga racemosa extract Ze 450 in vitro and in vivo in ob/ob mice.		C. Moser (2014)		Switzerland	ob/ ob Mice	68	Male	7–8 weeks	?	Cages	1	68	8 groups (8 animals in each)		?	Cimicifuga racemosa		Ze 450	Gavage	10-30-90mg/kg	7 days of treatment		Genetically modified		_	_	?	?	All blood samples (30 μl) were taken from the tail vein and plasma was frozen (−80 °C) pending analysis for glucose and insulin.			?
	29. Borapetoside C from Tinospora crispa improves insulin sensitivity in diabetic mice		Chi-Tun Ruan (2012)		Taiwan	Mice	?	Male	8-10 weeks	?	?	?	?	?		?	Tinospora crispa		borapetoside C	Orally	5 mg/kg	4 weeks of treatment		Streptozotocin (150 mg/kg)		Intraperitoneal Injection	Plasma glucose levels ≥150 mg/dl	Yes	Yes	Blood samples were collected from the orbital vascular plexus and were then centrifuged at 13,000 rpm for 5 min, and the plasma was kept on ice prior to the assay (Park et al. 2005). The plasma glucose concentration was measured using commercial kits following manufacturer's instructions (BioSystems S.A., Barcelona, Spain).			Glycogen content of skeletal muscles was measured according to an earlier established method (Sadasivam and Manickam 1996).
	30. Dehydrotrametenolic acid induces preadipocyte differentiation and sensitizes animal models of noninsulin-dependent diabetes mellitus to insulin.		Mayumi Sato (2002)		Japan	db/db C57BLKS/J Mice	?	Male	7 weeks	?	?	?	?	?		?	Poria cocos WOLF		Dehydrotrametenolic acid	Gavage	110 mg/kg	14 days of treatmente		Genetically modified		_	_	?	?	Serum insulin was determined using commercially available ELIZA kits, with mouse insulin used as the standard (Morinaga Institute of Biological Science, Yokohama, Japan).			?
	31. Effects of ingested fruiting bodies, submerged culture biomass, and acidic polysaccharide glucuronoxylomannan of Tremella mesenterica Retz.:Fr. on glycemic responses in normal and diabetic rats		Hui-Chen Lo (2006)		Taiwan	Wistar Rats	102	Male	?	200g	Cages	1	102	6 groups ( 12 animals in each group) and 3 groups (10 animals in each group)		Yes	Tremella mesenterica		Acidic polysaccharide glucuronoxylomannan (GXM)	Gavage	1 g/kg	15 days of treatment		Streptozotocin(65mg/kg) and nicotinamide (200 mg/kg)		Intraperitoneal Injection	Blood glucose concentrations > 250 mg/100 ml	Yes	Yes	The blood glucose concentration were determined using MediSense Card Blood Glucose Testing Systems (PrecisionPlus Electrodes, Abbott Laboratories, Bedford, MA, USA), using an electrochemical detection technique accompanied with glucose oxidase method.			Serum concentrations of albumin, cholesterol, triglyceride, creatinine, blood urea nitrogen (BUN), glutamate–oxaloacetate transaminase (GOT), and glutamate–pyruvate transaminase (GPT) were measured by an automatic analyzer
	32. Inhibition of Glycogen Synthase Kinase-3β by Falcarindiol Isolated from Japanese Parsley (Oenanthe javanica)		Jun Yoshida (2013)		Japan	GK Rats	12	Male	?	?	Cages	1	12	2 groups ( 6 animals in each group)		?	Oenanthe javanica		falcarindiol	Orally	15 mg / kg	?		Genetically modified		_	_	?	Yes	Blood glucose was measured at 0, 30, 60, 90, 120, 150, 180, 210, and 240 min via the tail vein with a blood glucose test meter (ACCU-CHECK Active, Roche Diagnostics Co., Tokyo, Japan). The areas under the curve (AUC) of changes in the blood glucose were determined from time 0 to 240 min after glucose administration.			?
	33. Isolation and antihyperglycemic activity of bakuchiol from otholubium pubescens (Fabaceae), a Peruvian Medicinal Plant Used for the Treatment of Diabetes		Krenisky JM (1999)		USA	C57BL/Ks db/db Mice and Sprague- Dawley rats	?	Male	8 weeks	?	?	4	?	? Groups (8 animals in each group)		?	Otholobium pubescens		Bakuchiol	Gavage	1-150- 250 mg / kg	2 weeks of treatment		Streptozotocin (50 mg/kg)		Intravenous injection	Hiperglycemia between 300-600 mg/ dl glucose	Yes	?	Blood and plasma glucose levels were measured with the Sigma Glucose Diagnostic Kit (Sigma No. 315). Plasma insulin levels were measured at 56h with the Rat Insulin RIA Kit from Linco Research (RI-13K; St Charles, MO).			Triglyceride levels were determined by the glycerol-3-phosphate oxidase (GPO)- Trinder method (Sigma test kit 339)
	34. LBP-4a improves insulin resistance via translocation and activation of GLUT4 in OLETF rats		Rui Zhao (2014)		China	Otsuka Long-Evans Tokushima Fatty (OLETF) Rats	18	Male	26 weeks	?	?	?	18	3 groups ( 6 animals in each group)		Yes	Lycium barbarum		Lycium barbarum polysaccharide (LBP-4a)	Orally	10 mg/kg	4 weeks of treatment		Genetically modified		_	_	?	Yes	Blood glucose was measured using the One-Touch Fast Take glucose meter (Jingdu, Japan).			?
	35. Meliacinolin: A Potent α-Glucosidase and α-Amylase Inhibitor Isolated from Azadirachta indica Leaves and in Vivo Antidiabetic Property in Streptozotocin-Nicotinamide-Induced Type 2 Diabetes in Mice		Rosa Martha Perez-Gutierrez (2012)		Mexico	Mice	42	Male	?	20-25 g	Cages	2	42	7 groups ( 6 animals in each group)		?	Azadirachta indica		Meliacinolin	Orally by gastric intubations	20mg/kg	28 days of treatment		Nicotinamide (120 mg / kg) and streptozotocin (60 mg / kg)		Intraperitoneally	Blood glucose >250mg/dL	Yes	?	Blood glucose levels were measured employing the glucose oxidase–peroxidase (GOD–POD) method.			The effect each group was investigated by serum determination of total cholesterol (TC), triglycerides (TG) and high density lipoprotein (HDL)-cholesterol, using a commercial Diagnostic Kit (Genzyme Diagnostics) and low density lipoprotein (LDL)-cholesterol was calculated as the remaining difference of total cholesterol and HDL.
	36. Novel Terpenoid-Type Quinones Isolated from Pycnanthus angolensis of Potential Utility in the Treatment of Type 2 Diabetes		Jian Luo (1999)		USA	C57BL / 6J-ob / ob (ob / ob) e C57BL / ks-db / db (db /db) Mice	?	Male	7–8 weeks	?	Cages	4	?	? groups (5- 8 animals in each group)		?	Pycnanthus angolensis		Novel Terpenoid-Type Quinones (SP-18904 and SP-18905)	Gavage	100 mg/kg	4 days of treatment		Streptozotocin (150mg/kg)		Intravenous injection	Glucose concentrations of 300 to 600 mg/dl	Yes	Yes	Plasma glucose concentrations were determined using the Glucose Diagnostic Kit (Sigma 315), an enzyme colorimetric assay. Plasma insulin levels were determined by using the Rat Insulin RIA Kit from Linco Research Inc. (Cat. No. RI-13K; St. Charles, MO).			Adipocytes used in this study were used on days 7 to 10 after differentiation. On the day of the experiment, adipocytes were washed with phosphate-buffered saline and switched to serum-free DMEM. Adipocytes were treated (in triplicate) for 18 h with 10 μM SP-18904 or SP-18905.
	37. Platyconic acid, a saponin from Platycodi radix, improves glucose homeostasis by enhancing insulin sensitivy in vitro and in vivo		Dae Young Kwon (2012)		South Korea	C57BL / 6J Mice	90	Male	8–10 weeks	?	?	1	90	6 groups (15 animals in each group)		Yes	Platycodi radix		Platyconic acid (PA), Platycodine D(PD), Platycoside E (PE), saponin with low activity (DPE)	Gavage	20 mg/kg	8 weeks of treatment		Streptozotocin (20 mg/kg)		?	Fasting hyperglycemia about 12 mM	Yes	Yes	Blood glucose levels were measured by tail bleeding at 0, 10, 20, 30, 40, 50, 60, 70, 80, 90, and 120 min after glucose loading with a portable glucometer, ACCU-CHEK (Roche Diagnostics, Indianapolis, IN) and checked by determining serum glucose levels using a Beckman Analyzer II (Beckman, Brea, CA).			Triacylglycerol was extracted with chloroform–methanol (2:1, vol/vol) from the liver and resuspended in pure chloroform. After evaporating chloroform, the residue was suspended with PBS with 0.1% triton X-100 and the suspension was sonicated and boiled for 5 min. The triacylglycerol contents of the suspensions were assayed using a Trinder kit (Young Dong Pharm., Seoul, Korea).
	38. Rhaponticin from rhubarb rhizomes alleviates liver steatosis and improves blood glucose and lipid profiles in KK/Ay diabetic mice		Jinlong Chen (2009)		China	Mice	30	Male and Female	8–12 weeks	?	Cages	1	30	3 groups (10 animals in each group)		Yes	Rheum franzenbachii Munt		Rhaponticin	Orally	125 mg/kg	4 weeks of treatment		Streptozotocin		?	?	Yes	?	Plasma insulin was determined by the insulin enzyme-linked immunoassay kit (Wako Chemicals).			Enzymatic assay kits were used for the determination of cholesterol (Determiner TC; cholesterol oxidase method; Kyowa Medex), triglycerides (TG LH; lipoprotein lipase method; Wako Chemicals), and NEFA (non-esterified fatty acid C; acyl-CoA oxidase method; Wako Chemicals).
	39. Rutin potentiates insulin receptor kinase to enhance insulin-dependent glucose transporter 4 translocation		Chia-Yu Hsu (2013)		Taiwan	Mice	?	Male	8 weeks	?	?	?	?	?		?	Toona sinensis		flavonoid rutin	Gavage	25 mg/kg	?		Insulin receptor antagonist S960 (50 nmol/kg)		Intravenous injection	?	Yes	?	Blood glucose was immediately determined by the glucose oxidase method using a glucose analyzer (Accu-Chek, Roche).			?
	40. Type 2 antidiabetic activity of bergenin from the roots ofCaesalpinia digyna Rottler		Rajesh Kumar (2012)		India	Charles foster Albino Rats	30	Male	?	?	?	?	30	5 groups ( 6 animals in each group)		?	Caesalpinia digyna Rottler		Bergenin	Orally	2,5, 5 e 10 mg / kg	14 days of treatment		Streptozotocin (65mg/kg) and Nicotinamide (110 mg/kg)		Intraperitoneal Injection	Fasting blood glucose level above 200 mg/dl	Yes	Yes	Blood samples were collected by retro-orbital plexus of eye under light ether anesthesia and fasting blood glucose levels were determined by glucose oxidase method on day 0th, 7th, and 14th with commercially available biochemical kit.			Plasma lipid profiles such as triglycerides (TG), total cholesterol (TC), High-density lipoprotein-cholesterol (HDL-C) and low-density lipoprotein-cholesterol (LDL-C) levels were determined by enzymatic methods using commercial kits obtained from Span Diagnostics, India.
FRACTIONS	41. A study on hypoglycaemic health care function of Stigma maydis polysaccharides.		Yan Zhang (2013)		China	SPF km Mice	?	Male	?	20±2 g	?	?	?	7 groups (animals in each group ?)		Yes	Stigma maydis		Stigma maydis polysaccharides	?	20mg/kg	4 weeks of treatment		Mice were fed with a high fat diet for 1 month and the modelling was continued with low-dose alloxan (90 mg/kg)		Intraperitoneal injection	Blood glucose≥10 mmol/L	Yes	?	Blood was sampled from hyperglycaemic model mice on the 7th, 14th, 21st and 28th days after the administration, and blood glucose level was directly measured with blood glucometer.			?
	42. Antidiabetic activities of extract from Malva verticillata seed via the activation of AMP-activated protein kinase.		Jeong YT (2011)		Korea	C57BLKS/J-db/ db Mice	?	?	5 weeks	?	Cages	5	?	5 groups (animals in each group?)		?	Malva verticillata		Ethanol extract of M. verticillata and N-hexane (MVE-H)	Orally	3 different concentrations of MVE-H (10, 20, or 40 mg/kg)	4 weeks of treatment		Genetically modified		_	_	Yes	?	Blood glucose level was measured using glucose oxidase strips (Glucocard test strips; Arkray, Inc., Japan).			The plasma glucose, total cholesterol, triglyceride, and HDL cholesterol were measured using an enzymatic test kit. LDL cholesterol and the ratio of HDL cholesterol to total cholesterol (HTR) were calculated by the following equation; LDL cholesterol = total cholesterol - HDL cholesterol - (triglyceride/5), HTR = HDL cholesterol / total cholesterol.
	43. Antidiabetic activity of alkaloids of Aerva lanata roots on streptozotocin-nicotinamide induced type-II diabetes in rats		Ritesh Agrawal (2013)		India	Wistar Rats	?	Male	?	200– 250 g	?	?	?	?		?	Aerva lanata Linn		The partially purified alkaloid basified toluene fraction (PPABTF)	Orally	10-20 mg/kg	2 weeks of treatment		Streptozotocin and Nicotinamide		Intraperitoneal injection	?	Yes	?	The fasting blood glucose level was determined at 0, 6, 12 and 20 h for acute study. Whereas, in sub acute study, fasting blood glucose estimation measurement was determined at 0, 10th and 15th day (Barik et al., 2008; Shirwaikar et al., 2006).			The total cholesterol, high density lipid (HDL), triglycerides, very low density lipid (VLDL) and low density lipid (LDL) were determined on 15th day of the study (Barik et al., 2008; Shirwaikar et al., 2006).
	44. Antidiabetic activity of Pterospermum acerifolium flowers and glucose uptake potential of bioactive fraction in L6 muscle cell lines with its HPLC fingerprint.		Rathinavelusamy Paramaguru (2014)		India	Albino Wistar rats	66	Male	?	180-200 g	Cages	?	66	11 groups( 6 animals in each group)		?	Pterospermum acerifolium		Ethyl acetate fraction (PAFEF)and subfractions PAFE1, PAFE2, e PAFE3	Intragastric tube	200-400mg/kg and 15- 30 mg/kg	30 days of treatment		Streptozotocin (60mg/kg) and nicotinamide (120mg/kg).		Intraperitoneal injection	Blood glucose concentration > 250 mg/dL	Yes	?	The fasting blood glucose was measured on day 0, 14, 21, and 28 by using glucometer (Bayer’s blood glucose measuring kit with counter strips).			Triglycerides, Total cholesterol (TC), HDL-C was estimated by Autospan triglycerides, TC, HDL-C estimation kits (Span diagnostics limited).
	45. Antidiabetic activity of Caesalpinia bonducella F. in chronic type 2 diabetic model in Long-Evans rats and evaluation of insulin secretagogue property of its fractions on isolated islets		Shrabana Chakrabarti (2005)		India	Long - Evans Rats	?	Male and Female	12–14 weeks	150g	?	?	?	5 groups (6-9 animals in each group)		?	Caesalpinia bonducella F.		Caesalpinia bonducella aqueos and alcoholic extracts (BM-170 and BM-171)	Orally	250 mg/kg	28 days of treatment		Streptozotocin in citrate buffer (pH 4.5) at dose of 90 mg/kg		Intraperitoneal injection	Blood glucose level of 7–12 mmol/L at 0 h and showing a highest rise to 13–20 mmol/L at 60 min, which returned to their 0 h value at 120 min	Yes	Yes	Serum glucose levels was estimated by glucose–oxidase–peroxidase method in microwell plate (Kunst et al., 1984) on ELISA reader at 515 nm and calculated with respect to standard calibration curve. Serum insulin was measured by rat insulin ELISA kit .			Serum cholesterol and triglycerides were estimated on initial and final days of experiment of each model by one-step enzymatic method in ELISA reader at 500 nm (Wybenga et al., 1970 and McGowan et al., 1981).
	46. Antidiabetic effect of an acidic polysaccharide (TAP) from Tremella aurantia and its degradation product (TAP-H)		Tadashi KIHO (2001)		Japan	KK- Ay-TA Mice	?	Male	5 weeks	25-30 g	?	1	?	3 groups (animals in each group?)		?	Tremella aurantia		Acidic Polysaccharide (TAP) and the Degradation Product (TAP-H)	Orally	0,5g/L , 1,5 g/L	10 weeks of tratment		Genetically modified		_	_	?	Yes	The plasma glucose concentration was determined by a glucose B-test kit (Wako Pure Chemical Ind., Ltd.) based on the glucose oxidase method. The plasma insulin level was measured using the Morinaga ELISA kit, purchased from Seikagaku Co.			The plasma cholesterol level, the plasma triglyceride level, the lipoperoxide level, and bile acids were measured using a commercial kit (Wako Pure Chemical Ind., Ltd.).
	47. Antidiabetic effect of orally administered conophylline-containing plant extract on streptozotocin-treated and Goto-Kakizaki rats.		Mikio Fujii (2009)		Japan	Goto-Kakizaki Rats	14	Male	5 weeks	?	?	?	14	3 groups (animals in each group?)		Yes	Tabernaemontana divaricata		The Crude Conophylline Preparation I (CCP-I)	Orally	200, 50 g/kg	15 days of treatment		Streptozotocin 60 mg/kg		Intraperitoneal injection	Blood glucose level > 250 mg/dl	Yes	?	The blood was taken from the abdominal main artery. Blood insulin was assayed with a Rat Insulin ELISA Kit (Shibayagi Co., Gunma, Japan).			?
	48. Antidiabetic effect of total flavonoids from Sanguis draxonis in type 2 diabetic rats.		Fufeng Chen (2013)		China	Sprague-Dawley Rats	72	Male	?	180–220 g	?	?	72	6 groups ( 6 animals in each group) for SD 6 groups ( 6 animals in each group) for SDF		?	Dracaena cochinchinensis		Sanguis draxonis (SD) and total flavonoids from SD (SDF)	Gavage	?	21 days of treatment		High-fat diet and a singular injection of streptozotocin (STZ) (35 mg/kg)		Intraperitoneal injection	Blood glucose level ≥11.1 mmol/L	Yes	Yes	At day 0, 7, 14, and 21 of treatment, blood samples were collected by the retro-orbital sinus puncture under diethyl ether anesthesia. The fasted plasma glucose levels were determined using a blood glucose meter (ONETOUCH, Ultra, Lifescan, USA).			The serum levels of triglycerides (TG), total cholesterol (TC), free fatty acids (FFA), low density lipoprotein cholesterol (LDL-C), and high density lipoprotein cholesterol (HDL-C) were determined by corresponding assay kits from Jiancheng Bioengineering Institute (Nanjing, Jiangsu Province, PR China).
	49. Antidiabetic effects of bitter gourd extracts in insulin-resistant db/db mice		Sandra D. Klomann (2010)		Germany	db/db Mice	45	Male	5 weeks	?	Cages	1	45	5 groups ( 9 animals in each group)		?	Momordica charantia		The lipid fraction, the saponin fraction or the hydrophilic residue of Bitter Gourd	Orally	150 mg/kg	5 weeks of treatment		Genetically modified		_	_	?	?	As a long-term parameter of blood glucose levels, glycated Hb levels were measured using a test kit (HA1C Kit) and an analyser (Dimension® Xpand™) obtained from Siemens Healthcare Diagnostics (Eschborn, Germany).			?
	50. Anti-diabetic effects of Centratherum anthelminticum seeds methanolic fraction on pancreatic cells, β-TC6 and its alleviating role in type 2 diabetic rats.		Aditya Arya (2012)		Malaysia	Sprague-Dawley Rats	72	Male and Female	?	180-200 g	?	?	72	12 groups ( 6 animals in each group)		?	Centratherum anthelminticum		Crude methanolic fraction (CAMFs)	Injected intraperitoneally (IP) or orally	50 and 100mg/kg	4 weeks of treatment		Streptozotocin STZ (65 mg/kg)		Intraperitoneal injection	Blood glucose range of 22–26 mmol/L	Yes	?	Fasting blood glucose concentrations were determined weekly after the above treatments by a glucose oxidase-peroxidase enzymatic method using a standardized glucometer (Accu-Check Performa, Roche Diagnostic Germany).			?
	17. Anti-diabetic effects of polysaccharides from Talinum triangulare in streptozotocin (STZ)-induced type 2 diabetic male mice		Wei Xu (2015)		China	SPF km Mice	50	Male	?	20 ± 2 g	?	?	50	5 groups ( 10 animals in each group)		Yes	Talinum triangulare		Polysaccharides obtained from Talinum triangulare (TTP)	Orally	150 and 300 mg/kg	2 weeks of treatment		Streptozotocin STZ (70 mg/kg)		Intraperitoneal injection	Fasting blood glucose (FBG) leveled over 7.8 mmol/l	Yes	?	Blood samples for fasting blood glucose were obtained from the tail vein and estimated using one Accu-Chek Active meter and active test strips for regular checkup.			TC, HDL, LDL and TG were measured spectrophotometrically by Assay kits for daily estimations, while the fasting serum insulin (FINS) levels were determined using an INS ELISA Kit (R&D Co).
	51. Anti-diabetic effects of the acetone fraction of Senna singueana stem bark in a type 2 diabetes rat model		Mohammed Auwal Ibrahim (2014)		South Africa	Sprague-Dawley Rats	48	Male	6 weeks	207.60±4.27 g	Cage	2	48	6 groups ( 8 animals in each group)		Yes	Senna singueana		Senna singueana acetone fraction (SSAF)	Orally	150 mg / kg and 300 mg / kg	4 weeks of treatment		Streptozotocin STZ (40 mg/kg )		Intraperitoneal injection	Non-fasting blood glucose (NFBG) level >18 mmol/l	Yes	?	The serum insulin concentrations were measured by an enzyme-linked immunosorbent assay (ELISA) method using an ultrasensitive rat insulin ELISA kit.			The serum lipid profile as well as liver function enzymes; aspartate and alanine transaminases (AST and ALT) and alkaline phosphatase (ALP) were measured using an Automated Chemistry Analyzer (Labmax Plenno, Labtest Co. Ltd., Lagoa Santa, Brazil) with commercial assay kits from the same company.
	52. Antidiabetic Potential of Polysaccharides from the White Oyster Culinary-Medicinal Mushroom Pleurotus florida (Higher Basidiomycetes)		Aditya Ganeshpurkar (2014)		India	Wistar Rats	20	Male	?	150–200 g	?	?	20	4 groups ( 5 animals in each group)		?	Pleurotus florida		P. florida polysaccharides (PFPs)	Orally	200 and 400 mg/kg	21 days of treatment		Streptozotocin (50-mg/kg)		Intraperitoneal injection	Blood glucose concentration was >200 mg/100 mL of blood.	Yes	?	Fasting blood glucose concentrations were determined using the glucose oxidase method (Accucheck).			Assay kits to measure plasma cholesterol, and triglycerides were purchased from Span Diagnostics (Gujarat, India). Glycosylated hemoglobin was estimated using the method described by Goldstein et al.
	53. Antihyperglycemic effects of total flavonoids from Polygonatum odoratum in STZ and alloxan-induced diabetic rats		Xiao-Shun Shu (2009)		China	Sprague-Dawley Rats	?	?	?	220 ± 4,5 g	Special animal house	?	?	?		?	Polygonatum odoratum		Total flavonids of Polygonatum(P) odoratum (TFP)	Orally	50, 100 e 200 mg/kg	30 days of treatment		Alloxan (100 and 120 mg/kg)		Intraperitoneal injection	Fasting blood glucose more than 11.0 mmol/L	Yes	?	Blood samples were collected from the retro-orbital plexus of rats for determination of the blood glucose and Insulin level, by using a radioimmunoassay kit (Bio-Sino Biotechnology Co., Beijing, China).			?
	54. Antioxidant and Anti-Inflammatory Effects of a Hypoglycemic Fraction from Cucurbita ficifolia Bouch_e in Streptozotocin-Induced Diabetes Mice		R. Roman-Ramos (2012)		Mexico	CD-1 Mice	?	Male	?	30-35g	?	?	?	?		?	Cucurbita ficifolia		Aqueous-Precipitate Fraction (AP-Fraction)	Gavage	200 mg/kg	15 days of treatment		Streptozotocin (137 mg/kg)		Intraperitoneal injection	?	?	?	Glycemia and glycated hemoglobin (HbA1c) were determined from blood samples drawn from the tail vein using the Accutrend Sensor system (Roche Diagnostics) and DCA 2000 (Bayer) respectively.			Quantification of total cholesterol, triglycerides, creatinine, uric acid, aspartate aminotransferase (AST or GOT), and alanine aminotransferase (ALT or GPT) was performed with a Reflotron System (Bayer) using the blood samples from the ocular orbital sinus.
	55. Effect of Lycium barbarum polysaccharide on the improvement of insulin resistance in NIDDM rats		Rui Zhao (2005)		China	Wistar Rats	40	Male	?	230-250 g	Cages	?	40	?		Yes	Lycium barbarum		Lycium barbarum polysaccharide (LBP)	Orally	10 mg/kg	3 weeks of treatment		Streptozotocin 0,5% at dose of 50mg/kg		Intraperitoneal injection	Serum glucose level of over 16 mmol/L	Yes	Yes	The serum glucose was determined by a one touch II micro blood glucose instrument (American Life Scan Company).			Total cholesterol and triglyceride were mensured by enzyme assay.
	56. Effects of Grape Seed Extract and its Ethylacetate/Ethanol Fraction on Blood Glucose Levels in a Model of Type 2 Diabetes		In Koo Hwang (2009)		South Korea	C57BL/KsJ-leprdb/leprdb Mice	98	Male	3 weeks	9,7-14,2 g	Conventional state	?	98	7 groups (14 in each group)		?	Vitisvinifera grape		Grape seed extract (GSE), Ethylacetate (E) and Ethylacetate/ethanol (EE)	Orally	50 and 30 mg/kg	8 weeks of treatment		Genetically modified		_	_	Yes	?	The blood glucose levels of the animalswere checked twice a week with a validated one touchbasic glucose measurement system.			TheHbA1c levels in serum samples were quantiﬁed withthe use of an HbA1c analyser (Tosoh, Japan) accordingto the protocol provided by the manufacturer.
	57. Hypoglycemic effect of Astragalus polysaccharide and its effect on PTP1B1		Yong WU (2005)		China	Sprague-Dawley Rat	34	Male	8 weeks	200g	?	5	44	4 groups (2 groups with 10 animals and 2 groups with 12 animals in each)		?	Astragalus membranaceus		Astragalus polysaccharide (APS)	Orally	400 mg/kg	5 weeks of treatment		Streptozotocin (30 mg/kg in 0.1 mol/L citrate-buffered saline, pH 4.5)		Intravenous injection	Fasting glucose levels >6.7 mmol/L	Yes	Yes	Insulin levels were determined by radio-immunoassay (RIA) with a kit from Beifang Biotech Research. Serum glucose concentrations were determined using a commercial assay kit (Sigma Diagnostics, St Louis, MO, USA).			?
	58. Hypoglycemic effects of MDG-1, a polysaccharide derived from Ophiopogon japonicas, in the ob/ob mouse model of type 2 diabetes mellitus		Jie Xu (2011)		China	Ob/ ob Mice	?		6-7 weeks	?	?	?	32	4 groups (8 animals in each group)		?	Ophiopogon japonicus		Water-soluble β-d-fructan (MDG-1)	Intragastrically	150 and 300 mg/kg	23 days of treatment		Genetically diabetic model		_	_	Yes	Yes	Plasma insulin levels were measured using a mouse insulin enzyme-linked immunosorbent assay (ELISA) kit (90080, CRYSTAL CHEM, IL, USA), and quantified against a recombinant mouse insulin calibration curve.			Total cholesterol and triglyceride levels were measured using an enzymatic colorimetric assay (Shanghai Institute of Biological Products, Shanghai, China).
	59. Isolation and pharmacological activities of the Tecoma stans alkaloids		Luca Costantino (2003)		Italy	C57BL/KsJ db/db Mice	?	Male	8 weeks	?	?	?	?	?		?	Tecoma stans		Tecoma stans alkaloids	Gavage	50 mg/kg and 63,4 mg/kg	7 days of treatment		Genetically diabetic model		_	_	?	Yes	Plasma Glucose were evaluated by Kit glucose GDH, Roche and Plasma insulin was assessed by Kit 125I-Rat insulin (Amersham)			Triglycerides, cholesterol, ure and fatty acids a were mensured by diagnostics Kits Roche
	60. Potent Effects of the Total Saponins from Dioscorea nipponica Makino Against Streptozotocin-Induced Type 2 Diabetes Mellitus in Rats		Hao YU (2015)		China	Wistar Rats	70	Male		190-200g	Cages	1	70	7 groups(8 animals in each group)		Yes	Dioscorea nipponica		Saponins from D. nipponica Makino (TSDN)	Orally	200-100 and 50 mg/kg	12 weeks of treatment		Streptozotocin (30 mg/kg in 0.1 mol/L acetate buffer pH 4.5)		Intraperitoneal injection	Fasting blood glucose levels > 16,7 mmol/L	Yes	Yes	Fasting blood glucose in serum was determined using ACCU-CHEK Performa blood glucose meter, and fasting insulin level was determined using Insulin Radioimmunoassay Kit.			The levels of TG, TC, HDL-c and LDL-c in serum were determined based on the commercial kits according to the manufacturer's instructions.
	61.Tocopherol from seeds of Cucurbita pepo against diabetes: validation by in vivo experiments supported bycomputational docking.		Bharti SK (2013)		India	Albino Wistar Rats	24	Male	?	150-160 g	?	?	24	4 groups ( 6 animals in each group)		?	Cucurbita pepo		Tocopherol	?	2- 5g/kg	6 weeks of treatment		PX-407 solution (10 mg/kg)		?	Blood glucose level of 200 mg/dL or higher	Yes	Yes	Plasma glucose levels were measured using a glucose oxidase commercial kit (Span Diagnostic Limited). Serum insulin (SI) was estimated by a radio immuno assay method. Insulin sensitivity of individual animals was evaluated using the previously validated homeostasis model assessment index33.			The serum was separated and analyzed spectrophotometrically for triglyceride (TG) and total cholesterol (TC) using a diagnostic reagent kit.
	62. Trapa natans L. root extract suppresses hyperglycemic and hepatotoxic effects in STZ-induced diabetic rat model		Chetna Kharbanda (2013)		India	Albino Wistar Rats	90	?	?	150-200g	Cages	?	90	15 groups (6 animals in each group)		?	Trapa natans L.		Methanol fraction, Chloroform fraction, petroleum ether fraction	Orally	50- 100 and 200 mg/kg	15 days of treatment		Streptozotocin (45 mg/kg )		Intraperitoneal injection	Blood glucose levels above 200 mg/dL	Yes	?	Plasma glucose concentration in blood samples collected on 0, 7 and 15th day post dose administration was estimated by GOD-POD method.			?

## Sheet: Table 2
																		FRACTIONS
	Miura, 2001	Kavishankar, 2013	Moser, 2014	Chen, 2009	Ruan, 2012	Sato, 2002	Lo, 2006	Yoshida, 2013	Zhao, 2014	Kumar, 2012	Luo, 1998	Gutierrez, 2012	Kwon, 2011	Krenisky, 1999	Hsu, 2013	Ren, 2014	Agrawal, 2013		Zhang, 2013	Jeong YT, 2011	Chakrabarti, 2004	Paramaguru, 2014	Kiho, 2001	Fugi, 2009	Chen, 2013	Xiao, 2012	Klomann, 2010	Arya, 2012	Xu, 2015	Ibrahim, 2014	Ganeshpurkar, 2014	Shu, 2009	Zhao, 2005	Hwang, 2008	Wu, 2004	Xu, 2011.	Constantino, 2003.	Yu, 2014.	Kharbanda , 2013.	Ramos, 2012.
Title
Accurate and concise description of the content of the article		X	X	X	X	X	X	X	X	X	X		X	X		X	X				X	X		X	X	X	X	X	X	X	X	X	X	X	X	X	X	X	X	X	33	0.8462
Abstract
Summary of the background, research objectives, methods, principal findings, and conclusions	X	X	X	X	X		X	X	X	X	X	X	X	X	X	X	X		X	X			X	X	X	X	X	X	X	X	X	X	X	X	X	X	X	X	X	X	36	0.923
Introduction
Sufficient scientific background	X	X	X	X	X		X	X	X	X		X	X	X	X	X	X		X	X	X	X	X	X	X	X	X	X	X	X	X	X	X	X	X	X	X	X	X	X	37	0.9487
Explanation of the experimetal approach and rationale		X	X	X	X	X	X	X	X	X	X	X	X	X	X	X	X		X	X	X	X	X	X	X	X	X	X	X	X	X	X	X	X	X	X	X	X		X	37	0.9487
Objectives
Clear primary and second objectives	X	X	X	X			X	X	X	X	X		X	X	X	X	X		X		X	X	X	X			X	X	X	X	X	X	X	X	X		X	X	X	X	32	0.8205
Material and Methods
Echical statement
Nature of the ethical review permissions, relevant lecenses and national or institutional guidelines for the care and use of animals		X	X	X	X	X	X	X	X	X	X	X	X	X	X	X	X		X	X		X	X		X	X	X	X	X	X	X	X	X	X	X	X	X	X	X	X	36	92.3%
Study design
Number of animals per group		X	X	X			X	X	X	X	X	X	X	X		X					X	X			X	X	X	X	X	X	X		X	X	X	X	X	X	X	X	29	0.7435
Information on whether the experimental was performed as a blind controlled study					X			X																X				X						X				X			6	0.1538
Experimental procedures
Treatment	X	X	X	X	X	X	X	X	X	X	X	X	X	X	X	X	X		X	X	X	X	X	X	X	X	X	X	X	X	X	X	X	X	X	X	X	X	X	X	39	1
Dosage of treatment	X	X	X	X	X	X	X	X	X	X	X	X		X	X	X	X		X	X	X	X	X	X		X	X	X	X	X	X	X	X	X	X	X	X	X	X	X	37	0.9487
Route of administration	X	X	X	X	X	X	X	X	X	X	X	X	X	X	X	X	X			X	X	X	X	X	X	X	X	X	X	X	X	X	X	X	X	X	X	X	X	X	38	0.9744
Duration of treatment	X	X	X	X		X	X			X	X	X		X	X	X	X		X	X	X	X	X	X	X	X	X	X	X	X	X	X	X	X	X	X	X	X	X	X	35	0.8974
Time of day of administration of treatment		X										X							X	X	X			X	X							X					X				9	0.2307
Location used for administration of treatment																													X												1	0.0256
Rationale for choice of specific dosage					X		X		X			X	X		X						X	X		X										X			X			X	12	0.3076
Rationale for choice of specific route of administration					X		X		X																												X		X	X	6	0.1538
Experimental animals
Information regarding animal species	X	X	X	X	X	X	X	X	X	X	X	X	X	X		X	X		X	X	X	X	X	X	X	X	X	X	X	X	X	X	X	X	X			X	X		35	0.8974
Strain of the animals		X			X	X	X	X	X	X	X		X			X	X		X	X	X	X	X	X	X	X	X			X	X	X	X	X	X			X	X	X	29	0.7436
Sex of the animals	X	X	X	X	X	X	X	X	X	X	X	X	X	X	X	X	X		X		X	X	X	X	X	X	X	X	X	X	X		X	X	X		X	X	X	X	36	0.923
Weigth range of the animals		X					X					X		X		X	X		X		X	X	X		X	X		X	X	X		X	X	X	X			X	X	X	22	0.5641
Age of the animals	X		X	X	X	X			X		X		X	X	X	X				X	X		X	X		X	X			X				X	X	X		X			22	0.5641
Description of genetic modification status (Knock-out, transgenic, SPF)	X		X	X					X	X	X				X				X	X			X	X					X					X	X		X	X	X	X	18	0.4615
Information related to previous procedures performed on the animals		X	X	X	X	X	X	X			X	X	X	X	X				X	X	X	X	X	X	X	X		X							X			X	X	X	25	0.641
Housing and husbandry
Housing of experimental animals (type of facility, type of cage or housing, material, number of cage companions)			X				X	X			X	X	X			X				X		X					X	X	X	X								X			14	0.3589
Husbandry conditions (breeding programme, ligth/dark cycle, temperature, of water)		X	X	X	X		X	X		X	X	X	X	X	X	X	X			X	X	X	X	X	X	X	X	X	X	X	X	X	X	X	X	X		X		X	33	0.8462
Welfare-related assesements and interventions that were carried out before, during, or after the experiment							X														X	X		X														X			5	0.1282
Sample size
Total number of animals used in each experimental and the number f animals in each experimental group		X	X	X			X	X	X	X		X	X			X						X		X	X	X	X	X	X	X	X		X			X		X			22	0.5641
Explanation regarding the decision of the number of animals and details of sample size calculation							X																											X							2	0.0512
Allocating animals to experimental groups
Full details of how animals were allocated to experimental groups (including randomisation or matching)				X			X		X				X						X					X		X			X	X			X					X			11	0.282
Order in which the animals in the different experimental groups were treated and assessed	X	X	X	X	X		X	X	X		X	X							X	X	X	X	X	X	X	X	X	X	X		X			X	X	X		X	X	X	28	0.7179
Experimental outcomes
Clear experimental outcomes assessed		X	X	X	X		X	X	X	X	X	X		X								X	X	X	X	X	X	X	X	X	X	X	X	X	X			X	X	X	28	0.7179
Statistical methods
Statistical methods used for each analysis	X	X	X	X	X		X	X	X	X			X	X	X	X	X		X	X	X	X	X	X	X	X	X	X	X	X		X	X	X	X	X		X	X	X	34	0.8718
Specification of the unit of analysis for each dataset				X	X		X	X	X	X		X	X	X	X	X	X		X	X	X	X	X	X	X	X	X	X	X	X	X	X	X	X	X	X		X	X	X	33	0.8461
Methods used to assess whether the data met the assumptions of the statistical approach	X	X	X	X	X		X	X	X	X		X	X	X		X	X		X	X	X	X	X	X	X	X	X	X	X	X	X	X	X	X	X			X	X	X	34	0.8718
Results
Baseline data
Description of health status of animals, for each experimental grup, before treatment	X	X	X	X					X	X									X	X	X	X	X	X	X			X		X			X		X			X			18	0.4615
Number analysed
Number or animals in each group included in each analysis (absolute numbers)							X	X		X						X											X	X		X			X	X	X			X		X	12	0.3076
Animals or data not included in the analysis (and explanation for the exclusion)																																			X						1	0.0256
Outcomes and estimation
Information (Mean= Standard Deviation)	X	X	X	X	X							X	X						X	X	X	X	X	X	X	X								X	X			X	X	X	20	0.5128
Information regarding quantification of inflammatory cells (Mean= Standard Deviation)																									X																1	0.0256
Adverse events
Information regarding mortality of experimental animals(Mean=Standard Deviation)			X																			X											X								3	0.0769
Modifications to the experimental protocols made to reduce adverse events			X																																			X			2	0.0512
Discussion
Interpretation /scientific implications
Interpretatio of the results, taking into account the study objectives and hypotheses, current theory and relevant studies	X	X	X	X		X	X	X	X	X	X	X	X	X	X		X		X	X	X	X	X	X	X	X	X	X	X	X	X	X	X	X	X			X	X	X	35	0.8974
Comments on the study limitations (sources of bias, limitations of the animal model, imprecision associated with the results)		X	X			X	X		X	X											X													X	X			X	X	X	12	0.3076
Generalisability /translation
Comments on how the findings are likely to translate to other species or systems, including relevance to human biology			X	X	X	X	X	X	X	X		X	X		X	X	X		X					X			X	X						X	X			X	X	X	22	0.5641
Funding
List of funding sources and the role of the funder(s) in the study		X	X	X						X			X	X	X	X	X			X	X	X		X	X	X	X	X	X	X	X	X	X	X	X		X	X	X	X	28	0.7179
Results	17	28	31	29	24	15	33	26	28	27	23	25	27	23	20	24	21		24	22	27	29	25	32	27	27	27	29	27	28	22	21	25	32	32	16	17	38	26	30
